# Supplementary material for: Hemifusomes and interacting proteolipid nanodroplets mediate multi-vesicular body formation
Source: Springer Nature journal article supplement (doi:10.1038/s41467-025-59887-9), 2025-05-17
Supplement: MOESM1 [file 41467_2025_59887_MOESM1_ESM.pdf]

**Supplementary Information for: Tavakoli, et al. Hemifusomes and Interacting Proteolipid Nanodroplets Mediate Multi-Vesicular Body Formation**

The PDF file includes:

Supplementary Figures 1 to 7

Other Supplementary Material for this manuscript includes the following:

**Supplementary Movie 1**

**Supplementary Movie 2**

**Supplementary Movie 3**

**Supplementary Movie 4**

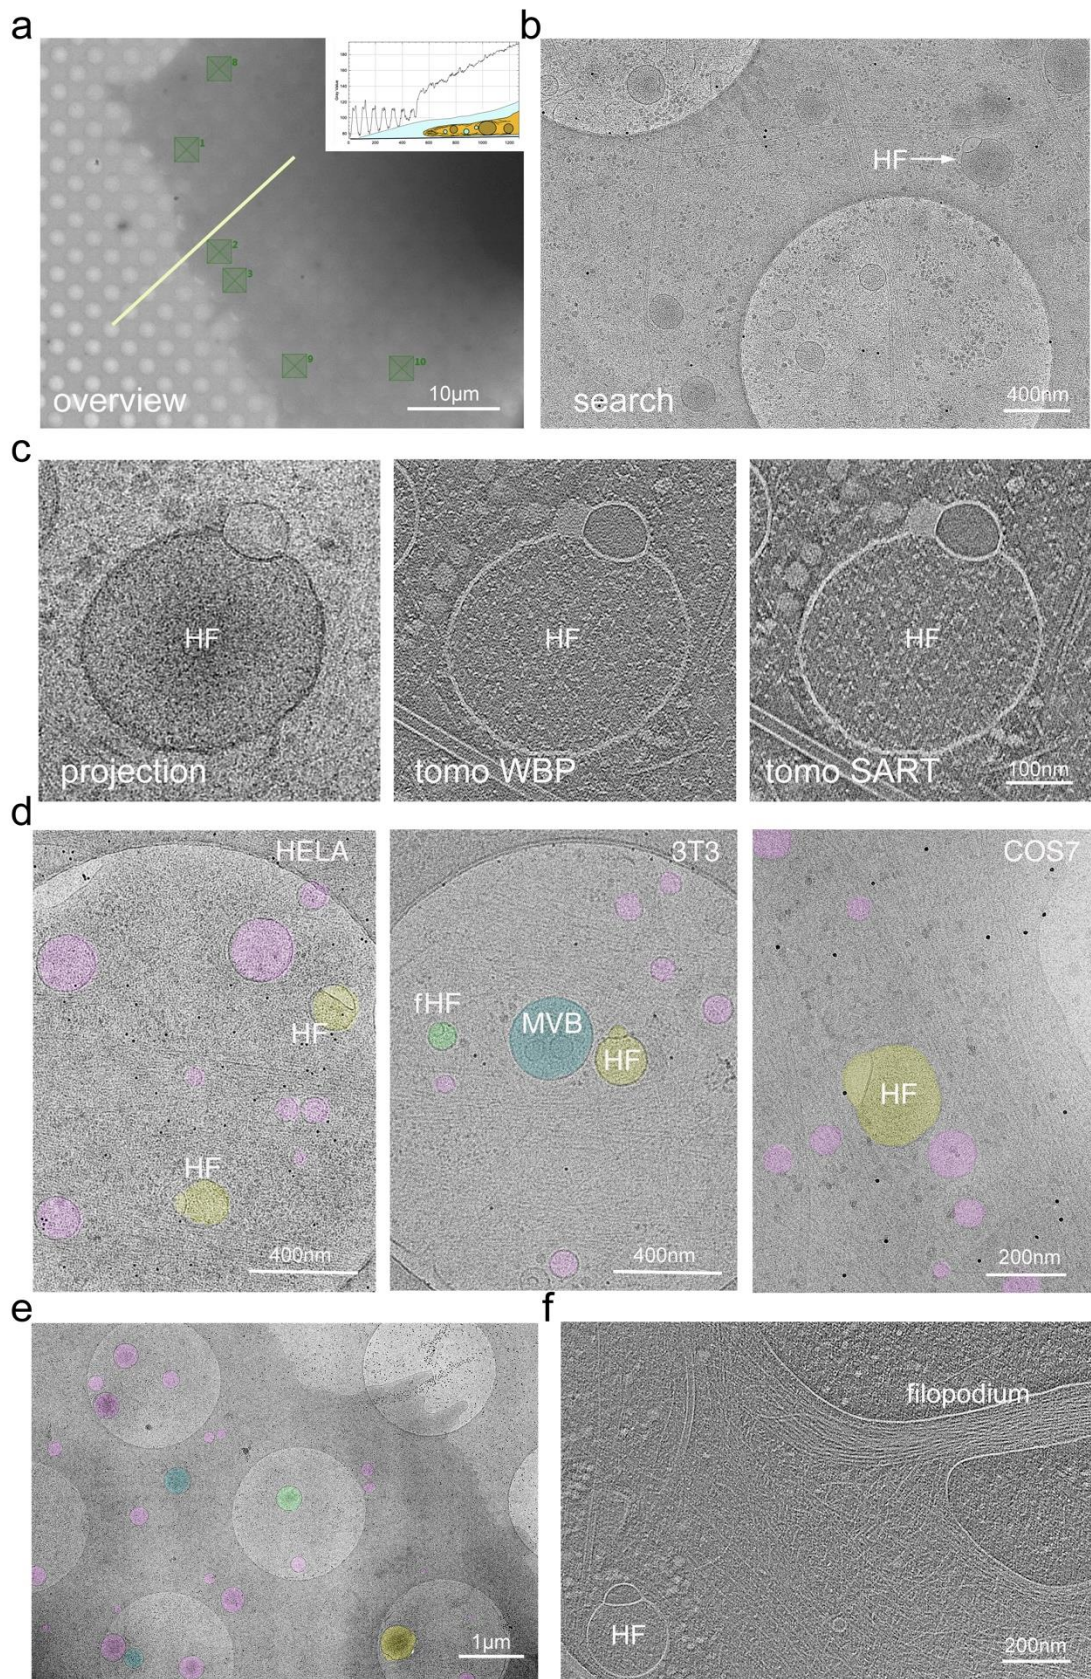

**Supplementary Figure 1. Workflow of image acquisition and distribution of hemifusomes and in various cell lines**

- a. Overview cryo-EM image of the leading edge of a COS-7 cell on a cryo-EM grid showing the gradient of ice thickness (inset) and examples of the targets selected for acquisition of “search” images and tilt series for tomography. Scale bar: 10  $\mu\text{m}$ .
- b. View of a representative “search” image. Hemifusome labeled HF. Scale bar: 400 nm.
- c. Close-up view of a representative “projection” image from a raw tilt series acquisition and corresponding tomographic reconstruction using either the weighted back projection (WBP) or simultaneous algebraic reconstruction technique (SART). Scale bar: 100 nm.
- d. Representative search views of HeLa 3T3, and COS-7 cells with vesicular organelles highlighted in color: endosome-like vesicles (EN, in pink); multivesicular bodies (MVB, in blue); hemifusomes (HF, in yellow); and flipped hemifusomes (fHF, in green). The COS-7 cell image in this panel was used to target and collect the tilt series, and reconstruct the tomogram shown in Figure 1b. Scale bar: 400 nm and 200 nm.
- e. Representative, low magnification, overview of a COS-7 cell periphery illustrating the frequency of hemifusomes compared to the other vesicular organelles in the cell border. Scale bar: 1  $\mu\text{m}$ .
- f. Tomogram slice of a COS-7 cell leading edge showing a hemifusome (HF) in a region of cytoplasm with a filopodia and a dense cytoskeletal network. Scale bar: 200 nm.



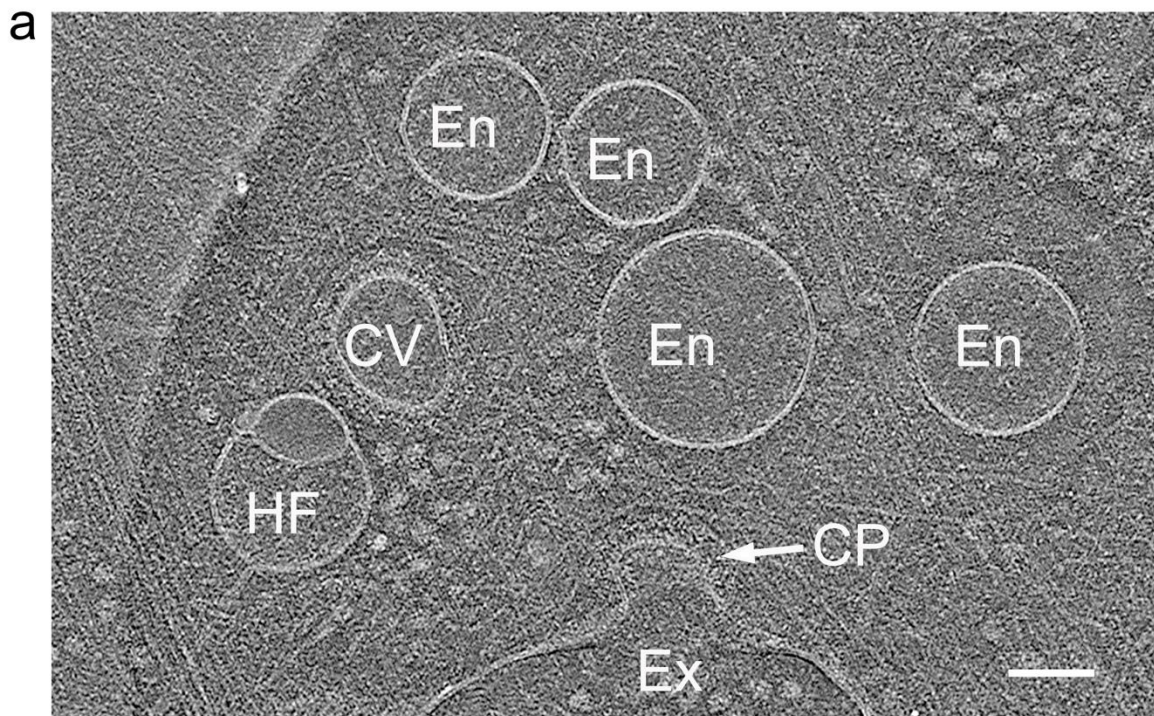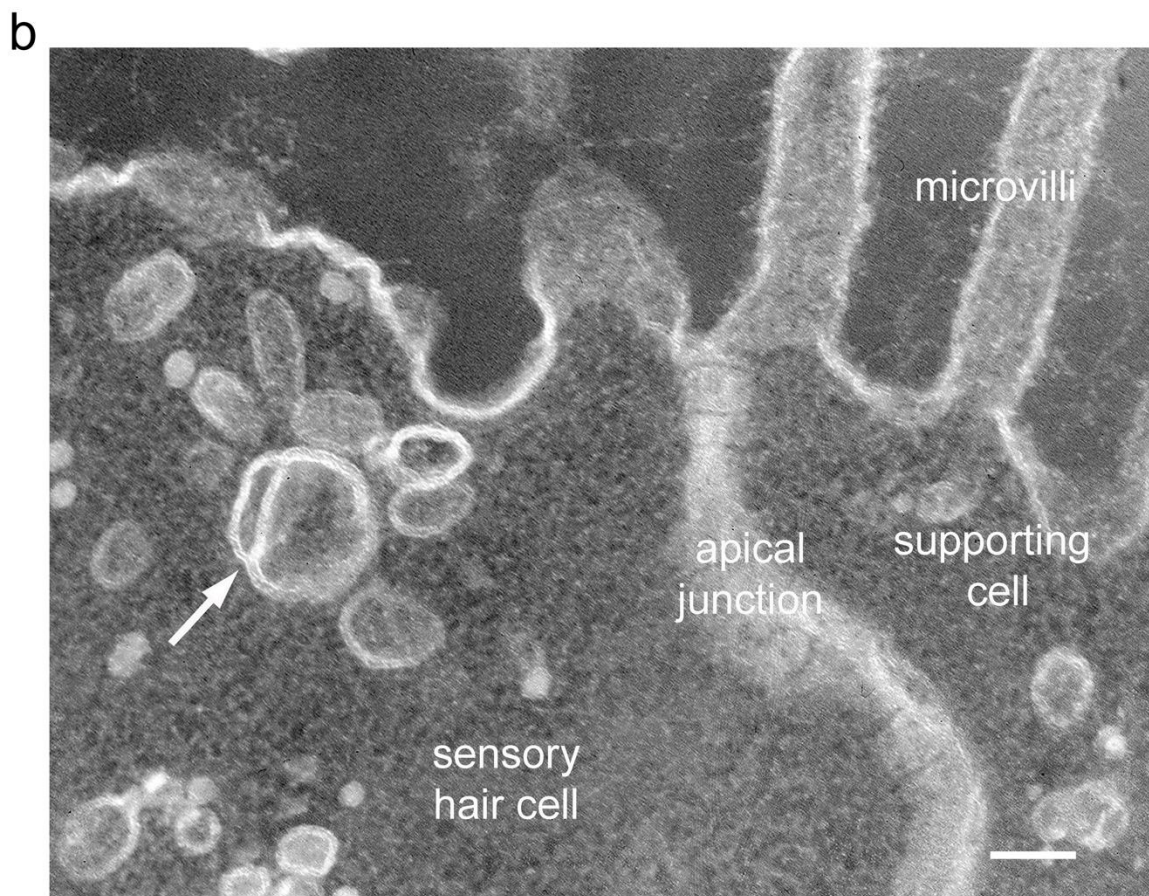

**Supplementary Figure 2. Hemifusomes among other vesicles in a cultured cell line and in a native epithelial cell**

a, Cryo-ET images of a COS-7 cell showing organelles at the cell periphery, including: a hemifusome (HF) near a clathrin-coated pit (CP), a clathrin-coated vesicle (CV), and variably sized endosome-like vesicles (En).

b. Conventional electron microscopy of a thin section of fixed and plastic-embedded epithelial cell from the frog macula. The image shows the apical cytoplasm of an epithelial cell with a hemifused pair of vesicles among several endosomal-like vesicles (archival image)<sup>26</sup>. Scale bars: 100 nm.





f. 3D-rendered segmentation of hemifusome in (e). The golden sphere in represents the proteolipid particle commonly located at the rim of the hemifusion diaphragm.

g. Schematic illustrating the missing wedge effect limitations of cryo-ET, where membranes cannot be visualized above and below a narrow strip of the total vesicle volume. Scale bars: 100 nm

h. Plot of compression factor

i-j. 3D views of segmented volumes of a multivesicular body (i) and a hemifused pair of vesicles (j) illustrating the missing wedge or missing cone effect in the reconstructed tomograms.

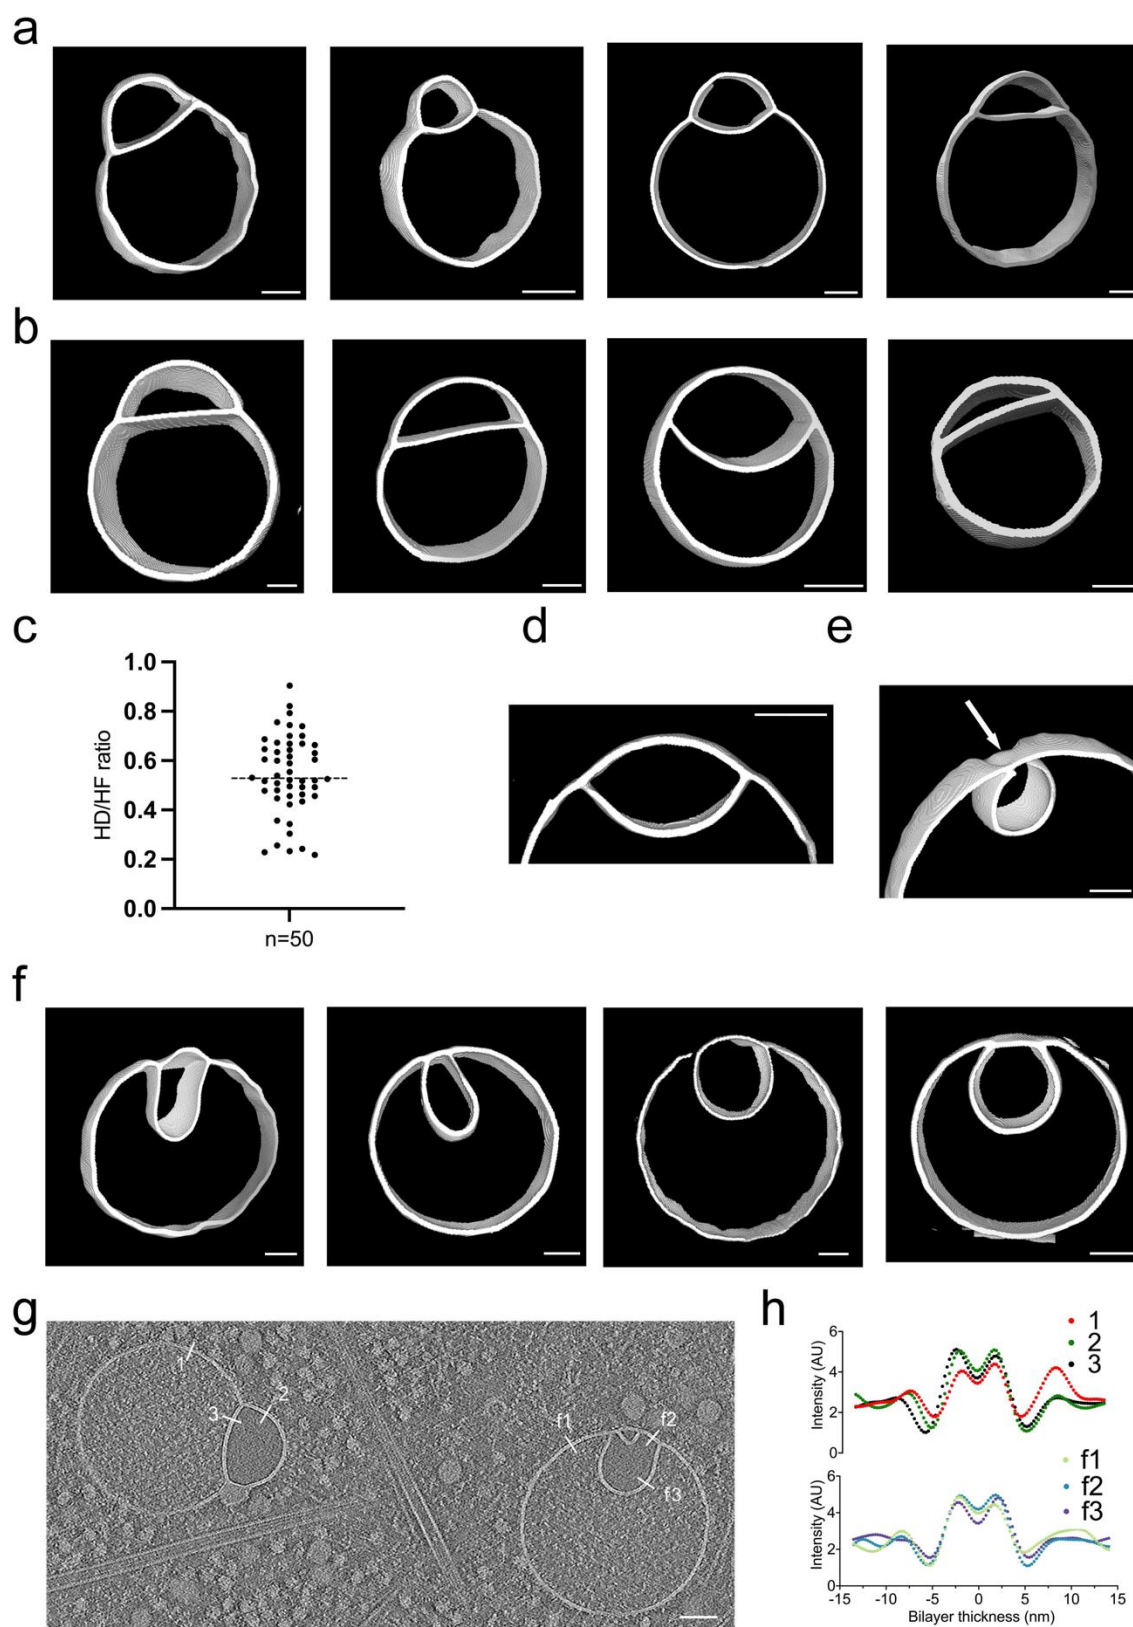



**Supplementary Figure 4. Range of morphologies of hemifusomes and flipped hemifusomes highlighted in segmented tomograms**

a-b. 3D views of segmented hemifusome membranes illustrating various size ratios, roundness, and curvature of the hemifusion diaphragm. These reconstructions are from hemifusomes shown in the main figures.

c. The ratio of diameters of the hemifusion diaphragm (HD) and larger vesicle of the hemifusome (HF).  $n = 50$  hemifusomes.

d. Close-up view of the lens-shaped structure of the smaller vesicle of the hemifusome.

e. 3D views of segmented flipped hemifusome membranes illustrating various degrees of inward budding of the smaller vesicle into the lumen of the larger vesicle.

f. Close-up view of the external hemifusion diaphragm (arrow). Note that some membranes of the flipped hemifusomes show subtle crenation indicative of reduced turgor.

g. Image of direct and flipped hemifusomes to illustrate where measurements were made for membrane bilayer thickness (lines drawn). Scale bars: 50 nm

h. Graphs depicting pixel intensity along the lines drawn in (g). The maxima in each trace represent each leaflet of the bilayer. Bilayer thicknesses measured: 1 = 4.15 nm, 2 = 4.11 nm, 3 = 4.55 nm, f1 = 4.14 nm, f2 = 4.14 nm, f3 = 4.55 nm.

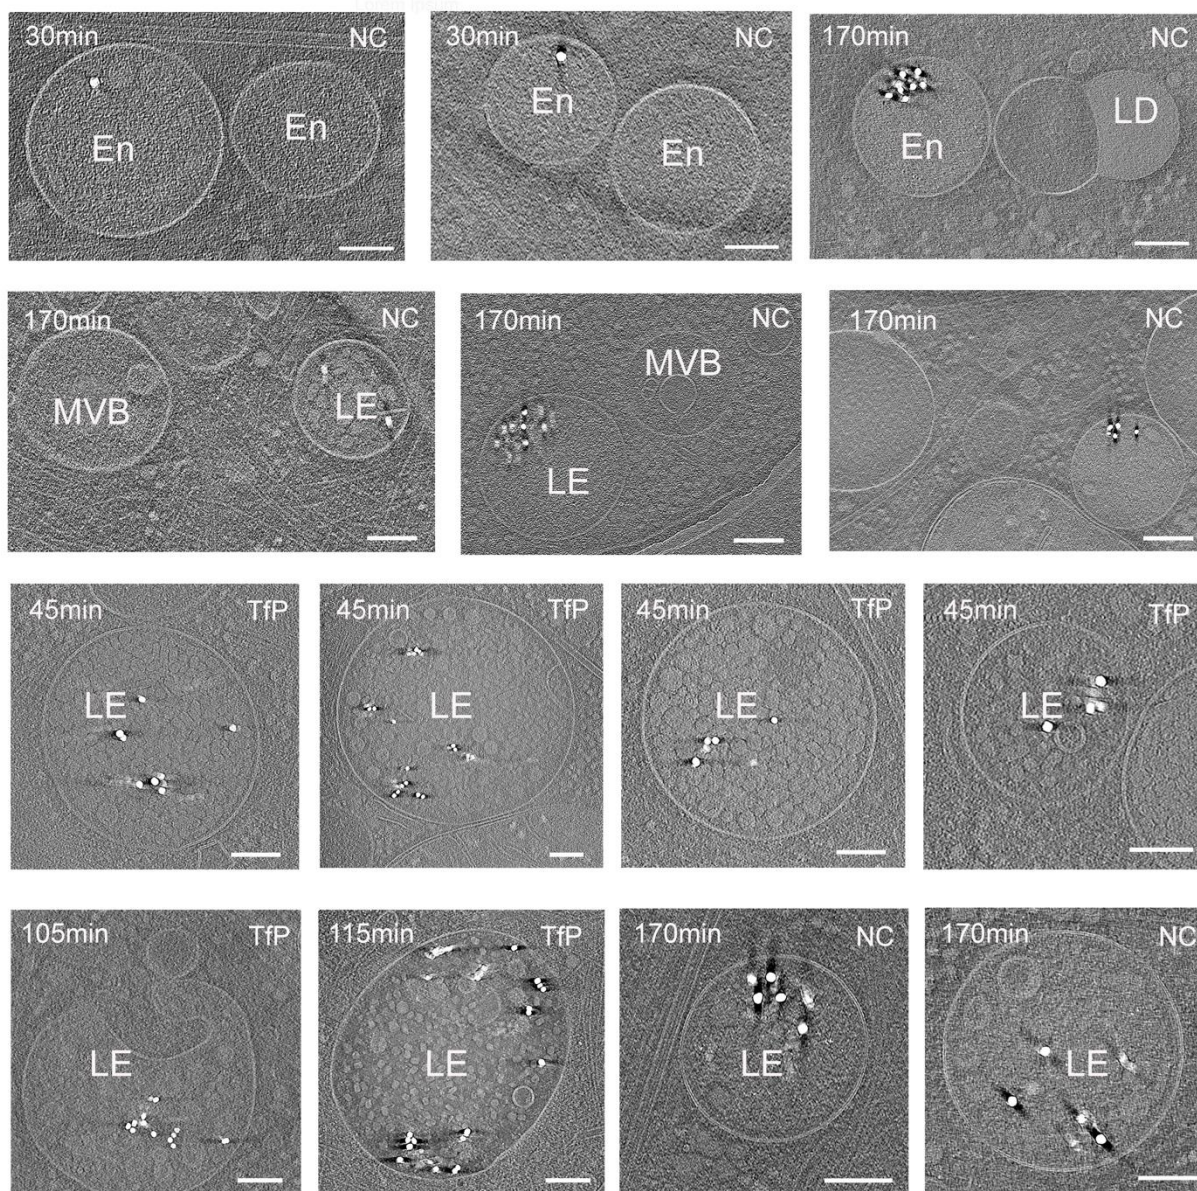

### Supplementary Figure 5. Pulse-chase of nanogold particles in the endocytic pathways

Tomographic slices examples of pulse-chase experiments showing the uptake of nanogold particles of various surface functionalization and sizes (small particles = 5 nm and large particles = 15 nm) in endosomes (En), and late endosomes or endolysosomes (LE), but absent from MVBs and a vesicle hemifused to a lipid droplet. Gold particles are enriched in mature, large lysosomes. T = time of incubation with the gold nanoparticles. TfP = gold nanoparticles with transferrin physisorbed and NC = gold nanoparticles with slightly negatively charged non-reactive polymer. Scale bars: 100 nm.

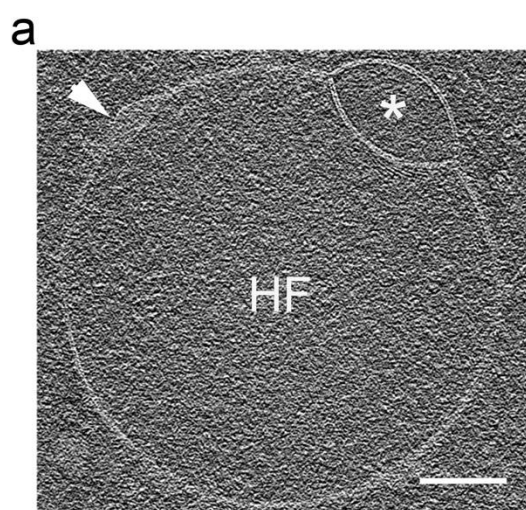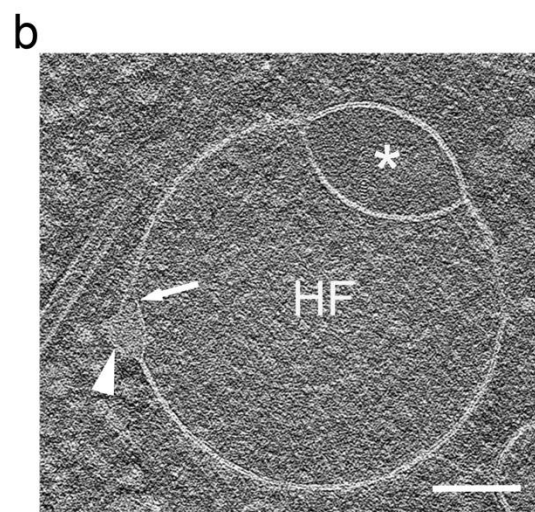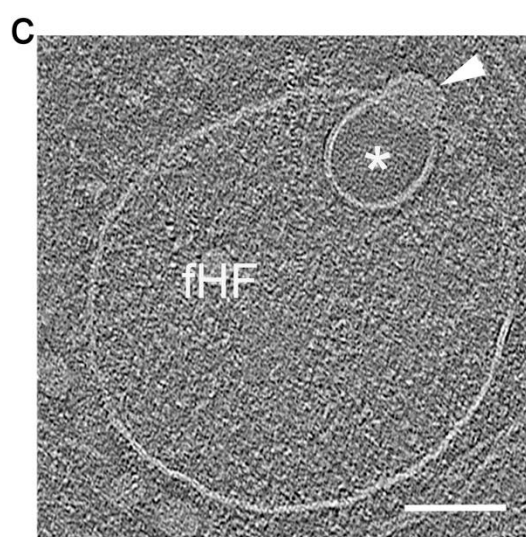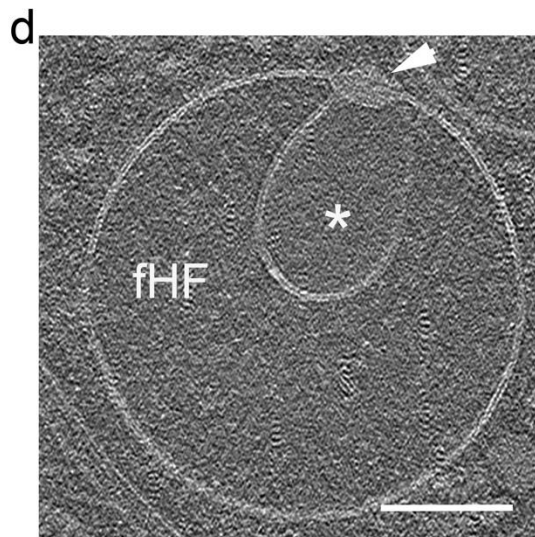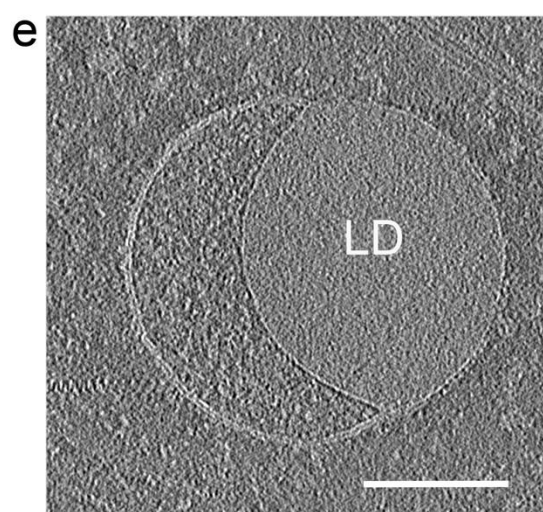



**Supplementary Figure 6. Proteolipid particles embedded in the membrane of hemifusomes, and flipped hemifusomes**

a-b. Tomographic slice representative of additional PNDs embedded in the membrane of hemifusomes (HF) at sites away from the initial HD.

c-d. Tomographic slice representatives of PND at the site of contact of the inner and outer vesicles of a flipped hemifusome (fHF). Asterisks mark vesicles with clear luminal content.

e. Hemifused endosome and lipid droplet (LD). The texture and contrast of the LD is very comparable to that of the PNDs in (a-d), highlighting that the PND very likely is comprised of lipids, but with a proteinaceous coat that contrasts with the lipid monolayer surrounding the LD. Scale bars: 100 nm

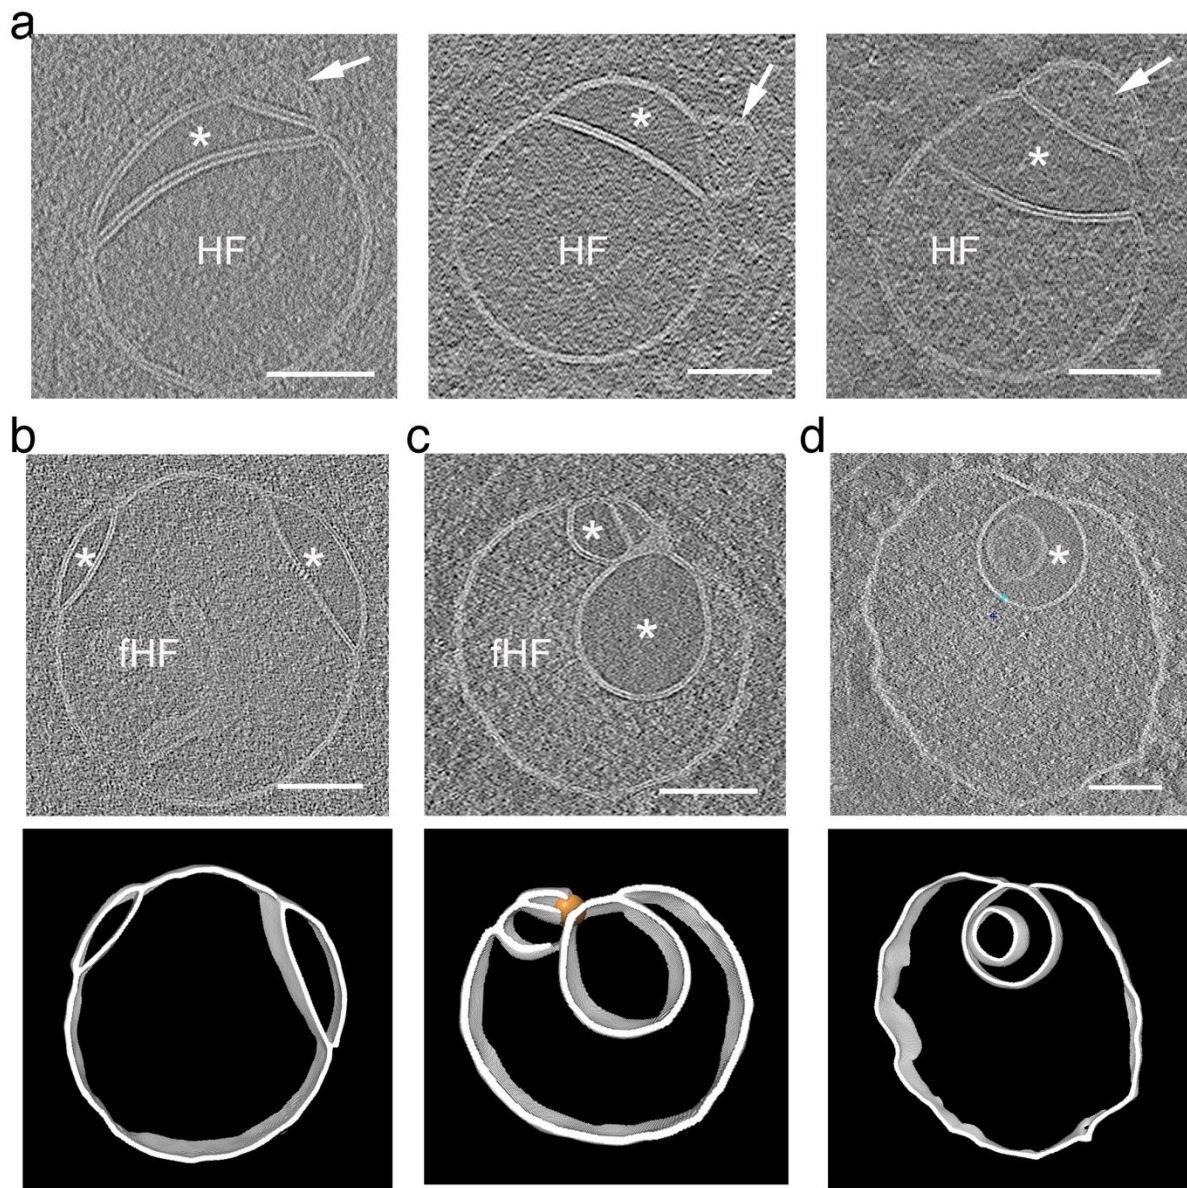

### Supplementary Figure 7. Additional examples of compound hemifusomes

a. Panel of cryo-ET slices showing compound hemifusomes and flipped hemifusomes, consistent with the hypothesis that they evolve into complex multivesicular bodies (MVB). Asterisks mark vesicles with clear luminal content.

b and d. Panel of cryo-ET images (top) and corresponding segmentation (bottom) of compound hemifusomes (HF), (b), compound flipped hemifusomes (fHF), (c), and compound fHF with free intraluminal vesicles (d). Often, the compound flipped hemifusome shows a slightly crenated membrane indicative of reduced turgor pressure. Scale bars: 100 nm.
